# Supplementary material for: Major depressive symptoms in breast cancer patients with ovarian function suppression: a cross-sectional study comparing ovarian ablation and gonadotropin-releasing hormone agonists
Source: Springer Nature journal article supplement (doi:10.1186/s12888-021-03611-6), 2021-12-01
Supplement: MOESM1 [file 19950762]

# PHQ-9 Scores

**Table Example of PHQ Depression Module for both Diagnostic and Severity Purposes**

|                                                                                                                                                                                 |                          | Not at all               | Several<br>days          | More than<br>half the<br>days | Nearly<br>every<br>day   |
|---------------------------------------------------------------------------------------------------------------------------------------------------------------------------------|--------------------------|--------------------------|--------------------------|-------------------------------|--------------------------|
| Over the <u>last 2 weeks</u> , how often have you been bothered by any of the following:                                                                                        | (0)                      | (1)                      | (2)                      | (3)                           |                          |
| a. Little interest or pleasure in doing things?.....                                                                                                                            | <input type="checkbox"/> | <input type="checkbox"/> | <input type="checkbox"/> | <input type="checkbox"/>      | <input type="checkbox"/> |
| b. Feeling down, depressed, or hopeless?.....                                                                                                                                   | <input type="checkbox"/> | <input type="checkbox"/> | <input type="checkbox"/> | <input type="checkbox"/>      | <input type="checkbox"/> |
| c. Trouble falling or staying asleep, or sleeping too much?                                                                                                                     | <input type="checkbox"/> | <input type="checkbox"/> | <input type="checkbox"/> | <input type="checkbox"/>      | <input type="checkbox"/> |
| d. Feeling tired or having little energy?.....                                                                                                                                  | <input type="checkbox"/> | <input type="checkbox"/> | <input type="checkbox"/> | <input type="checkbox"/>      | <input type="checkbox"/> |
| e. Poor appetite or overeating?.....                                                                                                                                            | <input type="checkbox"/> | <input type="checkbox"/> | <input type="checkbox"/> | <input type="checkbox"/>      | <input type="checkbox"/> |
| f. Feeling bad about yourself—or that you are a failure or have let yourself or your family down?.....                                                                          | <input type="checkbox"/> | <input type="checkbox"/> | <input type="checkbox"/> | <input type="checkbox"/>      | <input type="checkbox"/> |
| g. Trouble concentrating on things, such as reading the newspaper or watching television? .....                                                                                 | <input type="checkbox"/> | <input type="checkbox"/> | <input type="checkbox"/> | <input type="checkbox"/>      | <input type="checkbox"/> |
| h. Moving or speaking so slowly that other people could have noticed? Or the opposite—being so fidgety or restless that you have been moving around a lot more than usual?..... | <input type="checkbox"/> | <input type="checkbox"/> | <input type="checkbox"/> | <input type="checkbox"/>      | <input type="checkbox"/> |
| i. Thoughts that you would be better off dead or of hurting yourself in some way? .....                                                                                         | <input type="checkbox"/> | <input type="checkbox"/> | <input type="checkbox"/> | <input type="checkbox"/>      | <input type="checkbox"/> |

**Table PHQ-9 Scores and Proposed Treatment Actions**

| <b>PHQ-9 Score</b> | <b>Depression Severity</b> | <b>Proposed Treatment Actions</b>                                                                                                                                                                 |
|--------------------|----------------------------|---------------------------------------------------------------------------------------------------------------------------------------------------------------------------------------------------|
| 0 – 4              | None-minimal               | None                                                                                                                                                                                              |
| 5 – 9              | Mild                       | Watchful waiting; repeat PHQ-9 at follow-up                                                                                                                                                       |
| 10 – 14            | Moderate                   | Treatment plan, considering counseling, follow-up and/or pharmacotherapy                                                                                                                          |
| 15 – 19            | Moderately Severe          | Active treatment with pharmacotherapy and/or psychotherapy                                                                                                                                        |
| 20 – 27            | Severe                     | Immediate initiation of pharmacotherapy and, if severe impairment or poor response to therapy, expedited referral to a mental health specialist for psychotherapy and/or collaborative management |
